# Supplementary material for: Fabrication of conductive, transparent and superhydrophobic thin films consisting of multi-walled carbon nanotubes
Source: Royal Society of Chemistry journal article supplement (doi:10.1039/c4ra04272g), 2014-07-02
Supplement: c4ra04272g1.pdf [file c4ra04272g1.pdf]

## Fabrication of conductive, transparent and superhydrophobic thin films consisting of multi-walled carbon nanotubes

Eun Ji Park<sup>1,||</sup>, Kwang-Dae Kim<sup>1,||</sup>, Hye Soo Yoon<sup>1</sup>, Myung-Geun Jeong<sup>1</sup>, Dae Han Kim<sup>1</sup>,  
Dong Chan Lim<sup>2</sup>, Yong Ho Kim<sup>1,3,\*</sup> and Young Dok Kim<sup>1,4,\*</sup>

<sup>1</sup> Department of Chemistry, Sungkyunkwan University, Suwon 440-746, Republic of Korea

<sup>2</sup> Surface Technology Division, Korea Institute of Materials Science (KIMS), Changwon 641-010, Republic of Korea

<sup>3</sup> SKKU Advanced Institute of Nanotechnology (SAINT), Sungkyunkwan University, Suwon 440-746, Republic of Korea

<sup>4</sup> Biorefinery Research Group, Korea Research Institute of Chemical Technology, Daejeon 305-600, Republic of Korea

### Supporting Information

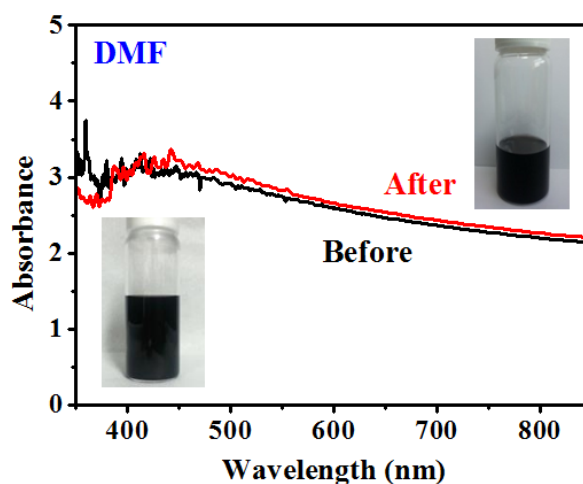

**Supporting Information 1.** Absorbance spectra of P-MWCNT/DMF solutions before and after 9 month. Inset images show a view of each MWCNT/DFM solution in vial.

We centrifuged the MWCNTs dispersed solutions and the supernatants containing well-dispersed MWCNTs were collected. Therefore, absorbance of the solution in the UV/Vis range can be directly related to dispersity of MWCNTs in organic solvents. The stability of the dispersed MWCNTs in DMF solution was demonstrated by comparing the absorbance of as-prepared solution and solution after 9 month. No significant change in between absorbance spectra before and after 9 month was observed (Supporting Information 1). This result correlates with stability of the P-MWCNTs in the DMF solution. It was worth mentioning the MWCNTs in DMF solution maintained its dispersity even after 9 month.
